# Supplementary material for: Optimization of an in vitro Pseudomonas aeruginosa Biofilm Model to Examine Antibiotic Pharmacodynamics at the Air-Liquid Interface
Source: PubMed Central journal article supplement (PMC10907394; doi:10.1038/s41522-024-00483-y), 2024-03-01
Supplement: 41522_2024_483_MOESM1_ESM.pdf [file 41522_2024_483_MOESM1_ESM.pdf]

## SUPPLEMENTARY INFORMATION

**Supplementary Figure 1.** Activity of polymyxin B (**A**) and tobramycin (**B**) against PAO1 at the TSB concentrations that were used in the dynamic one-compartment model (30 g/L) and the air-liquid interface PK/PD biofilm model (3 g/L). When PAO1 was grown in the media with a lower concentration of TSB, polymyxin B displayed enhanced activity at 2 and 4 hours while tobramycin displayed enhanced activity between 2 and 48 hours.

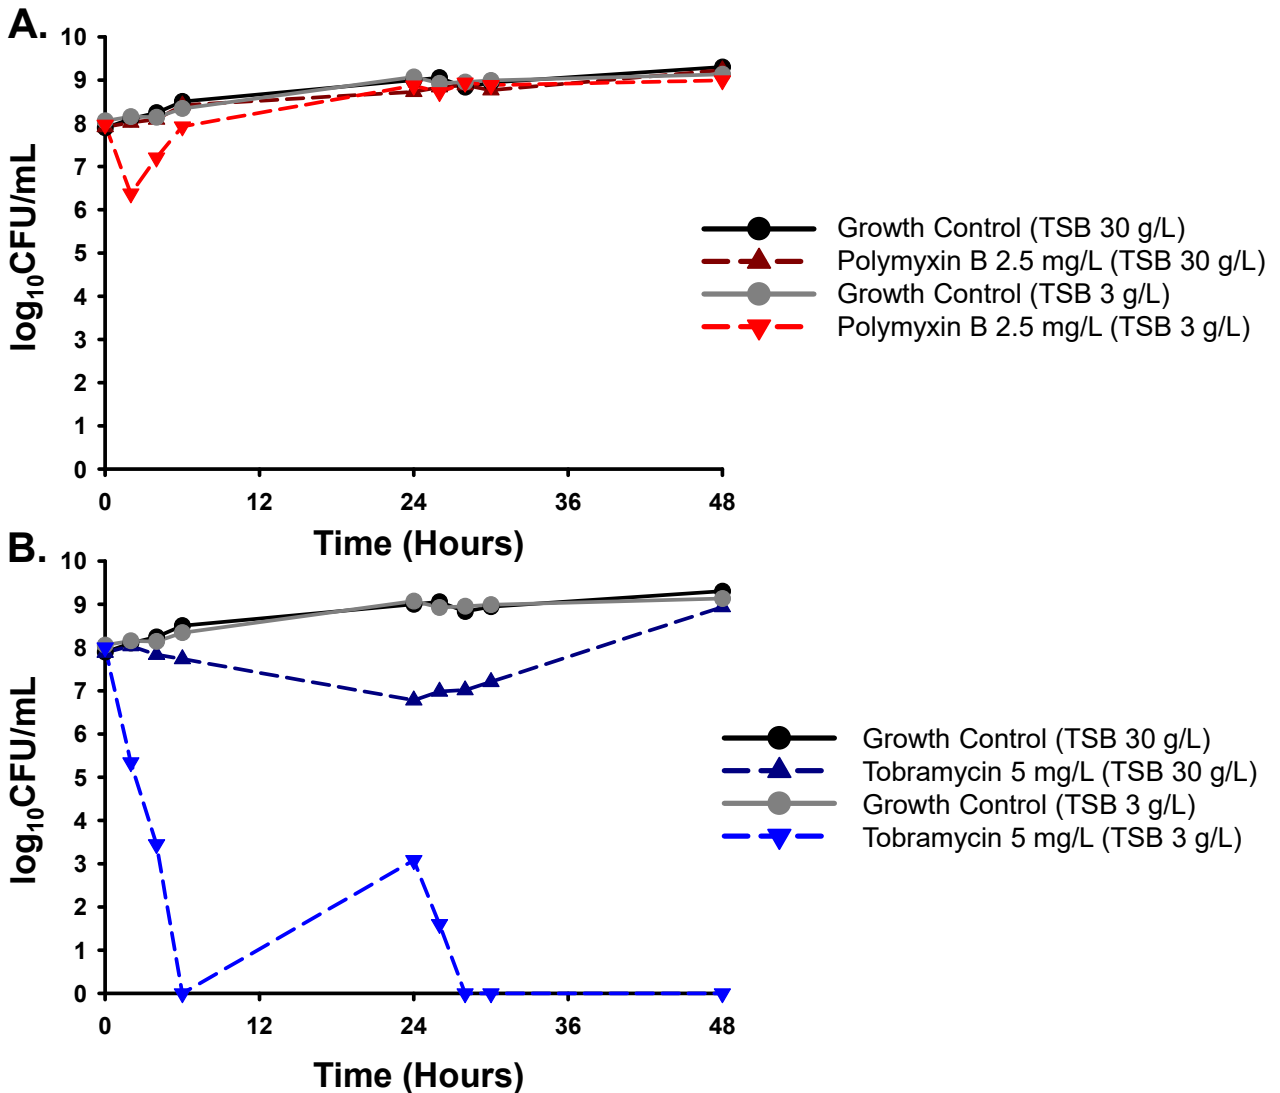

**Supplementary Table 1.** Analyses of the mean viable counts of *P. aeruginosa* following exposure to tobramycin and polymyxin B in the biofilm and planktonic PK/PD models. Data were combined from both strains (PAO1 and AR0064) to calculate the mean values. Two-sided student's t-tests were used to compare tobramycin to polymyxin B at 6, 24, and 48 hours for each of the simulated modes of administration (intravenous and inhaled). A *P* value of <0.05 was considered statistically significant.

| <b>Biofilm: 6 Hours</b>     |                                    |                       |          |           |
|-----------------------------|------------------------------------|-----------------------|----------|-----------|
| <b>Treatment Regimen</b>    | <b>Mean Log<sub>10</sub>CFU/mL</b> | <b><i>P</i> value</b> | <b>t</b> | <b>df</b> |
| Tobramycin IV (n=4)         | 9.003                              | 0.346                 | 1.022    | 6         |
| Polymyxin B IV (n=4)        | 9.249                              |                       |          |           |
| Tobramycin INH (n=4)        | 7.206                              | <b>0.009</b>          | 3.824    | 6         |
| Polymyxin B INH (n=4)       | 4.974                              |                       |          |           |
| <b>Biofilm: 24 Hours</b>    |                                    |                       |          |           |
| <b>Treatment Regimen</b>    | <b>Mean Log<sub>10</sub>CFU/mL</b> | <b><i>P</i> value</b> | <b>t</b> | <b>df</b> |
| Tobramycin IV (n=4)         | 9.166                              | 0.201                 | 1.436    | 6         |
| Polymyxin B IV (n=4)        | 8.518                              |                       |          |           |
| Tobramycin INH (n=4)        | 5.566                              | 0.890                 | 0.144    | 7         |
| Polymyxin B INH (n=5)       | 5.656                              |                       |          |           |
| <b>Biofilm: 48 Hours</b>    |                                    |                       |          |           |
| <b>Treatment Regimen</b>    | <b>Mean Log<sub>10</sub>CFU/mL</b> | <b><i>P</i> value</b> | <b>t</b> | <b>df</b> |
| Tobramycin IV (n=4)         | 9.158                              | 0.565                 | 0.610    | 6         |
| Polymyxin B IV (n=4)        | 8.917                              |                       |          |           |
| Tobramycin INH (n=4)        | 5.087                              | <b>0.006</b>          | 4.120    | 6         |
| Polymyxin B INH (n=4)       | 6.352                              |                       |          |           |
| <b>Planktonic: 6 Hours</b>  |                                    |                       |          |           |
| <b>Treatment Regimen</b>    | <b>Mean Log<sub>10</sub>CFU/mL</b> | <b><i>P</i> value</b> | <b>t</b> | <b>df</b> |
| Tobramycin IV (n=4)         | 7.560                              | <b>0.003</b>          | 4.697    | 6         |
| Polymyxin B IV (n=4)        | 5.672                              |                       |          |           |
| Tobramycin INH (n=4)        | 4.885                              | 0.262                 | 1.239    | 6         |
| Polymyxin B INH (n=4)       | 3.531                              |                       |          |           |
| <b>Planktonic: 24 Hours</b> |                                    |                       |          |           |
| <b>Treatment Regimen</b>    | <b>Mean Log<sub>10</sub>CFU/mL</b> | <b><i>P</i> value</b> | <b>t</b> | <b>df</b> |
| Tobramycin IV (n=4)         | 8.028                              | <b>0.032</b>          | 2.792    | 6         |
| Polymyxin B IV (n=4)        | 7.221                              |                       |          |           |
| Tobramycin INH (n=4)        | 6.546                              | 0.743                 | 0.343    | 6         |
| Polymyxin B INH (n=4)       | 6.379                              |                       |          |           |
| <b>Planktonic: 48 Hours</b> |                                    |                       |          |           |
| <b>Treatment Regimen</b>    | <b>Mean Log<sub>10</sub>CFU/mL</b> | <b><i>P</i> value</b> | <b>t</b> | <b>df</b> |
| Tobramycin IV (n=4)         | 8.169                              | 0.676                 | 0.439    | 6         |
| Polymyxin B IV (n=4)        | 8.265                              |                       |          |           |
| Tobramycin INH (n=4)        | 6.376                              | 0.724                 | 0.370    | 6         |
| Polymyxin B INH (n=4)       | 6.641                              |                       |          |           |

*P* values < 0.05 appear in bold

**Supplementary Table 2.** Predicted pharmacokinetic/pharmacodynamic exposures for tobramycin and polymyxin B against *P. aeruginosa* PAO1 and AR0064. Aminoglycoside activity has been correlated with  $fAUC/MIC$  and  $fC_{max}/MIC$  whereas the activity of polymyxin B is primarily attributed to optimizing the  $fAUC/MIC$ .

| Bacterial Isolate | Tobramycin IV |                | Tobramycin INH |                | Polymyxin B IV           | Polymyxin B INH |
|-------------------|---------------|----------------|----------------|----------------|--------------------------|-----------------|
|                   | $fAUC/MIC$    | $fC_{max}/MIC$ | $fAUC/MIC$     | $fC_{max}/MIC$ | $fAUC/MIC$               | $fAUC/MIC$      |
| PAO1              | 24            | 14             | 3173.1         | 1000           | 35.2 / 23.5 <sup>1</sup> | 874.5           |
| AR0064            | 3             | 1.8            | 396.6          | 125            | 35.2 / 23.5 <sup>1</sup> | 874.5           |

<sup>1</sup>The first value is the  $fAUC/MIC$  ratio from 0-24 hours while the second value is the  $fAUC/MIC$  ratio from 24-48 hours.
